# Supplementary material for: Facile preparation of stereochemistry-controllable biobased poly(butylene maleate-co-butylene fumarate) unsaturated copolyesters: a chemoselective polymer platform for versatile functionalization via aza-Michael addition
Source: Royal Society of Chemistry journal article supplement (doi:10.1039/c8py01051j), 2018-01-01
Supplement: c8py01051j1.pdf [file c8py01051j1.pdf]

## SUPPORTING INFORMATION

### Facile Preparation of Stereochemistry-controllable Biobased Poly(butylene maleate-co-butylene fumarate) Unsaturated Copolyesters: A Chemoselective Polymer Platform for Versatile Functionalization via Aza-Michael Addition

Yang Yu, Zhiyong Wei\*, Xuefei Leng, Yang Li

State Key Laboratory of Fine Chemicals, Department of Polymer Science and Engineering, School of Chemical Engineering, Dalian University of Technology, Dalian 116024, China

\* Corresponding author

*Email address:* zywei@dlut.edu.cn (Z. Wei)

**Calculation of average sequence length of butylene maleate ( $L_{ncis}$ ) and butylene fumarate ( $L_{ntrans}$ ) segments, and the degree of polyester randomness ( $R$ ).** The resonance absorptions of the  $\alpha$ -carbon of butylene segment were resolved with a curve-fitting program based on the least squares parameter adjustment criterion using the Gauss-Newton iteration procedure. The fitting process adjusts the peak position, the curve shape (a Gaussian fraction; whereby zero represents a pure Lorentzian and unity represents a pure Gaussian), and the peak width and the height in such a way that a best fit is obtained. The excellent agreement between the experimental and fitted spectra were founded with a regression coefficient  $R^2 > 0.995$ , Figure S1 displayed the resolution result of Entry 12, as an instance. The four triads are assigned to fumarate butylene maleate (*trans/cis*) at 64.75 ppm, fumarate butylene fumarate (*trans/trans*) at 64.70 ppm, maleate butylene maleate (*cis/cis*) at 64.62 ppm, and maleate butylene fumarate (*cis/trans*) at 64.56 ppm, respectively. From the four peak areas ( $A_{trans/cis}$ ,  $A_{trans/trans}$ ,  $A_{cis/cis}$ , and  $A_{cis/trans}$ ), molar ratios of butylene fumarate ( $P_{trans}$ ) and butylene maleate ( $P_{cis}$ ) groups were firstly calculated by the following equations:

$$P_{trans} = [(A_{trans/cis} + A_{cis/trans})/2 + (A_{trans/trans})]$$

$$P_{cis} = [(A_{trans/cis} + A_{cis/trans})/2 + (A_{cis/cis})]$$

Next, the following equations were used to calculate number average sequence length of butylene maleate ( $L_{ncis}$ ) and butylene fumarate ( $L_{ntrans}$ ) segments:

$$L_{ntrans} = 2 P_{trans} / (A_{trans/cis} + A_{cis/trans})$$

$$L_{ncis} = 2 P_{cis} / (A_{trans/cis} + A_{cis/trans})$$

Then, the following equation was used to calculate the degree of randomness ( $R$ ):

$$R = 1 / L_{ntrans} + 1 / L_{ncis}$$

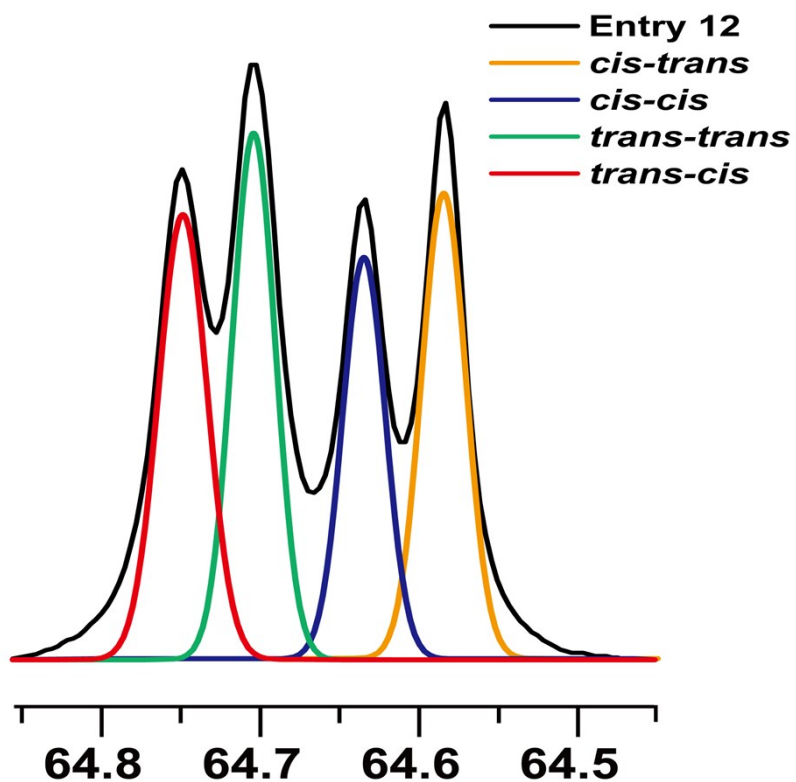

**Figure S1.** Peak fitting of the methylene carbon resonance in quantitative  $^{13}\text{C}$  NMR spectrum of Entry12 as an example.

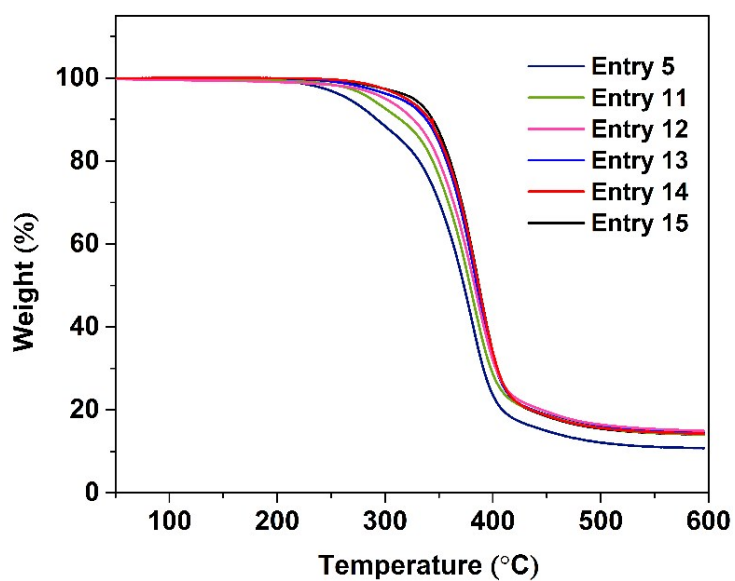

Figure S2. Thermoanalytical curves of poly(BM-co-BF) copolyesters.

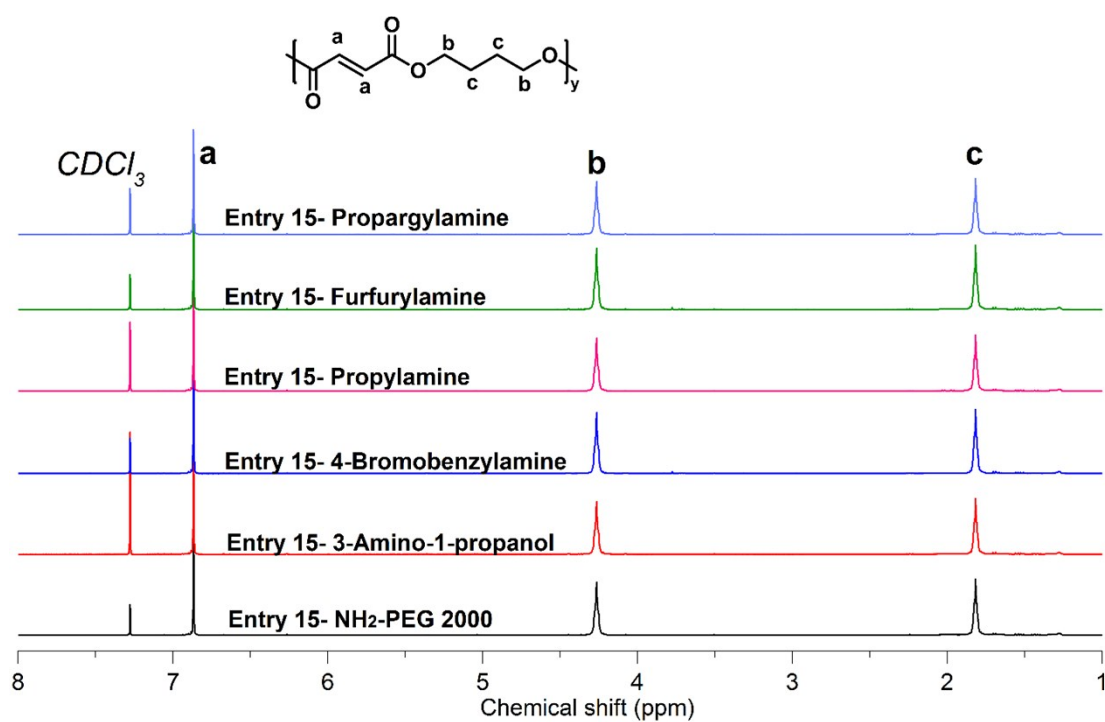

Figure S3.  $^1\text{H}$  NMR spectra of model reaction. Entry 15 reacted with primary amine compounds for 10h at room temperature, and no aza- Michael addition occurred.

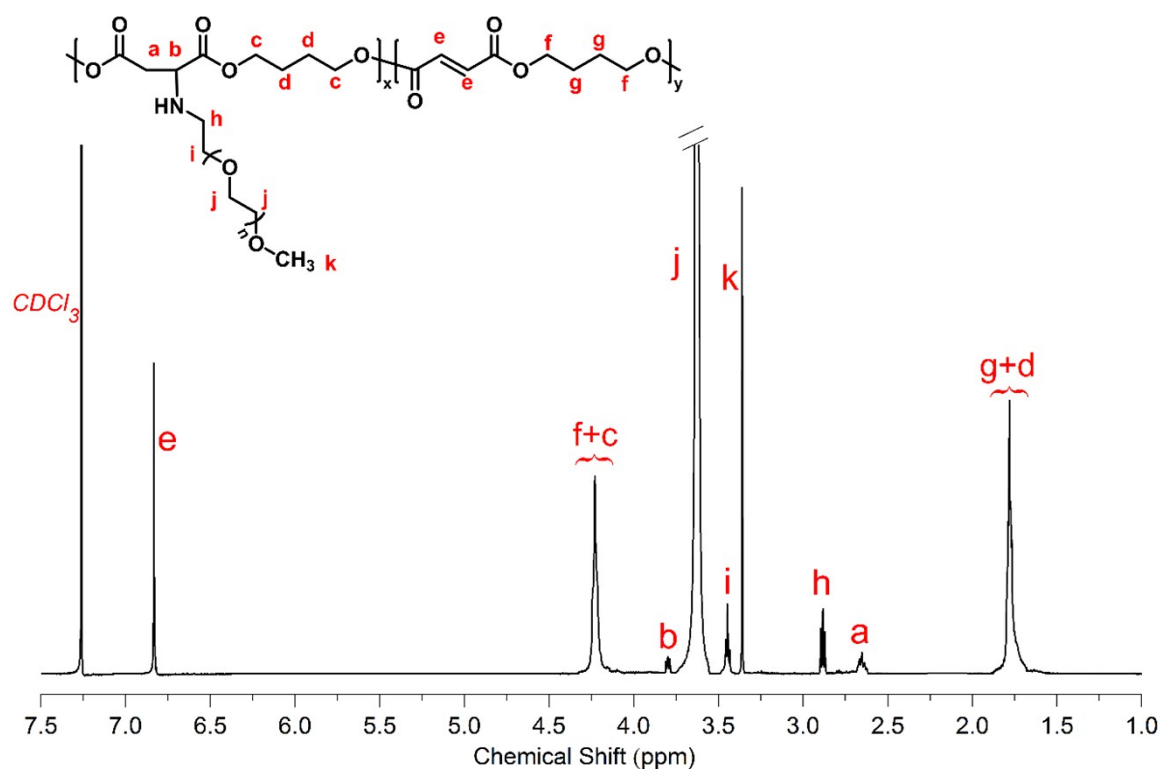

**Figure S4.**  $^1\text{H}$  NMR spectrum of Entry 16 prepared by Michael addition of Entry 5 with  $\text{NH}_2\text{-PEG 2000}$ .

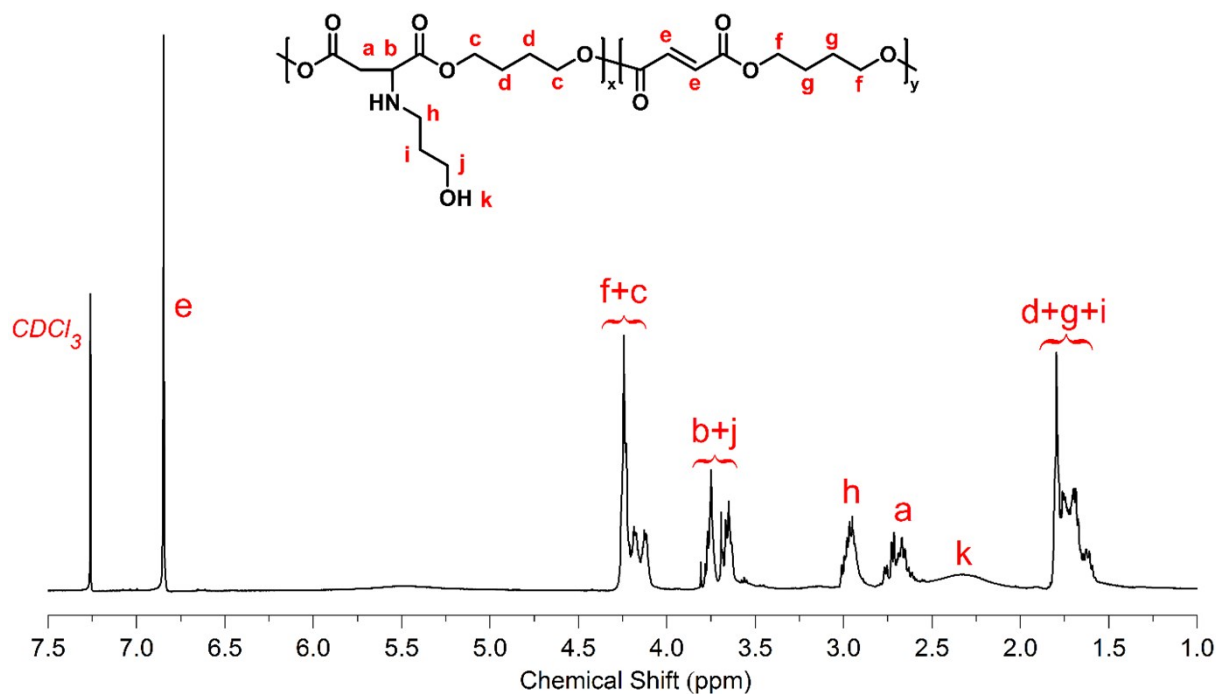

**Figure S5.**  $^1\text{H}$  NMR spectrum of Entry 17 prepared by Michael addition of Entry 5 with 3-Amino-1-propanol.

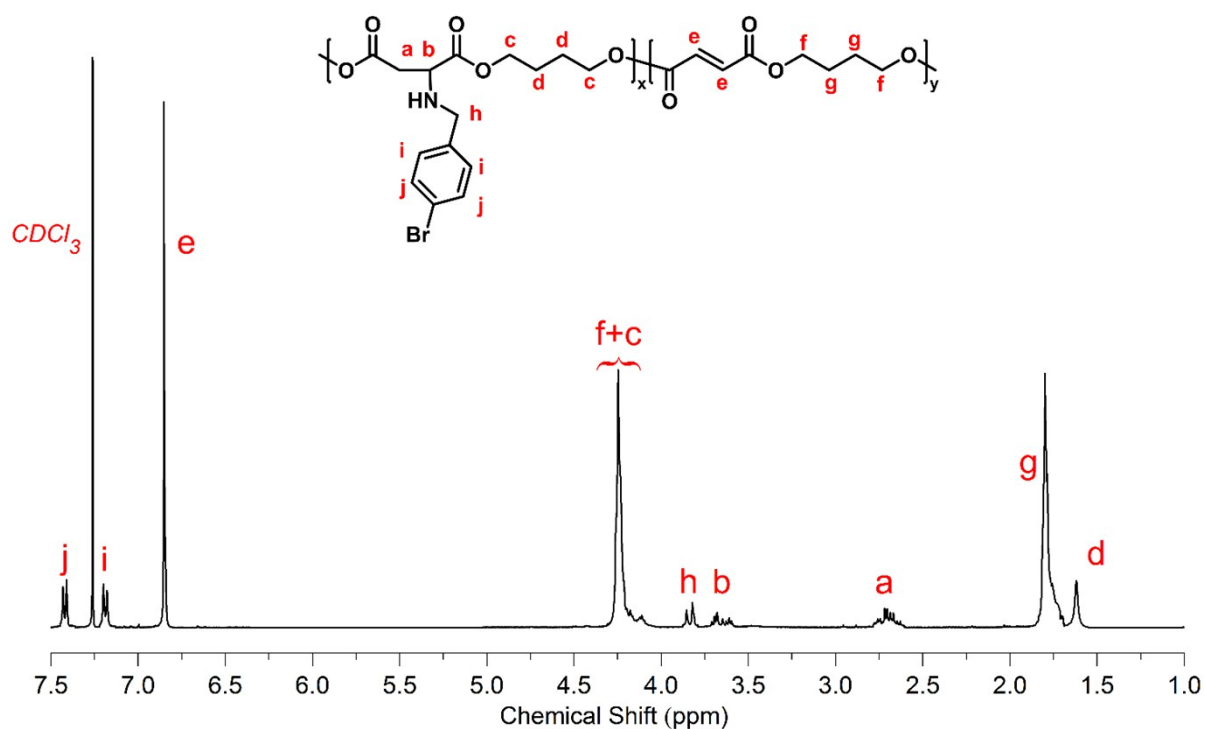

**Figure S6.**  $^1\text{H}$  NMR spectrum of Entry 18 prepared by Michael addition of Entry 5 with 4-Bromobenzylamine.

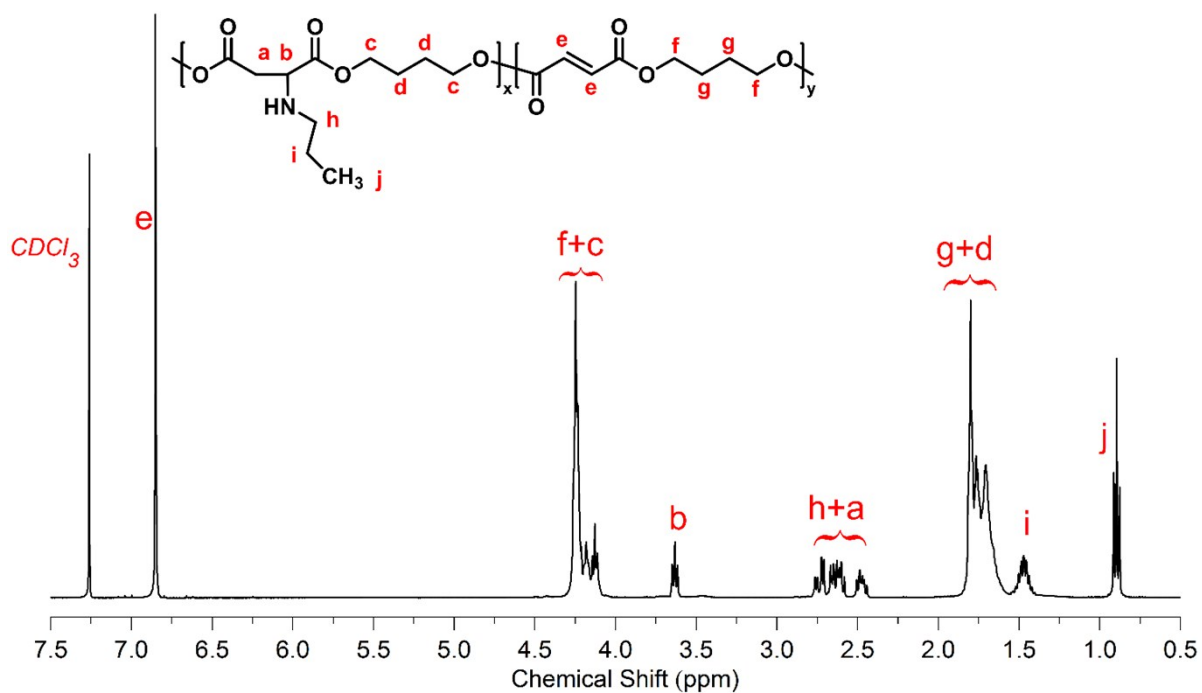

**Figure S7.**  $^1\text{H}$  NMR spectrum of Entry 19 prepared by Michael addition of Entry 5 with propylamine.

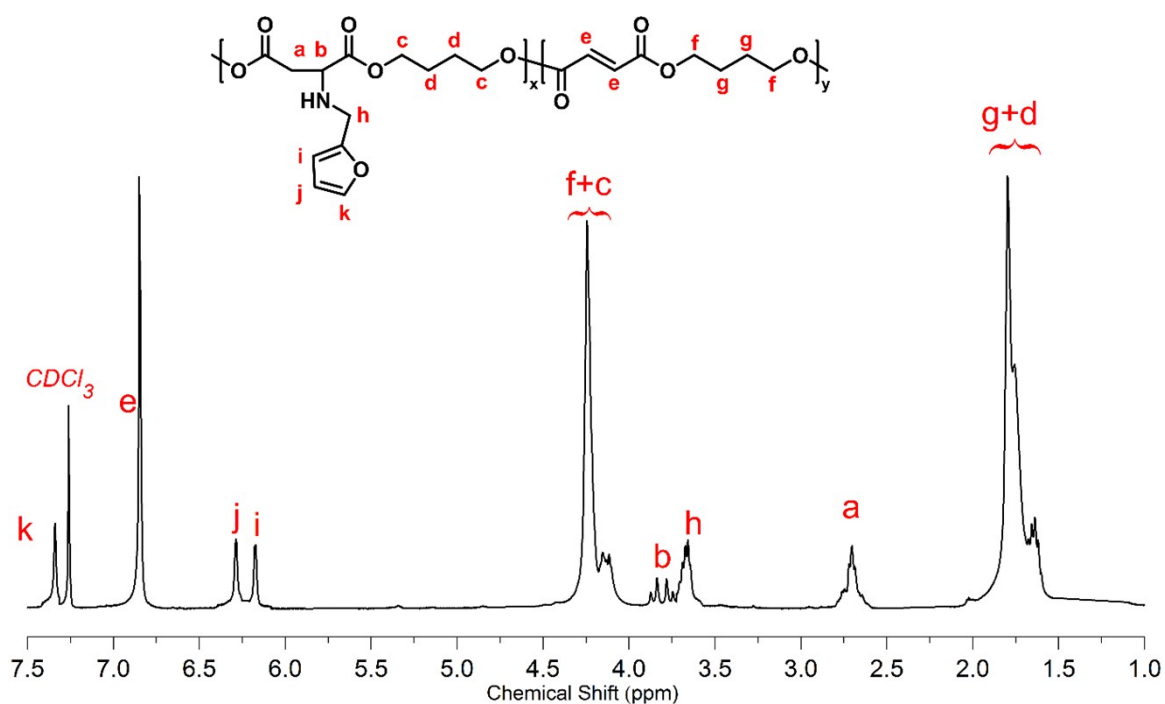

**Figure S8.** <sup>1</sup>H NMR spectrum of Entry 20 prepared by Michael addition of Entry 5 with furfurylamine.

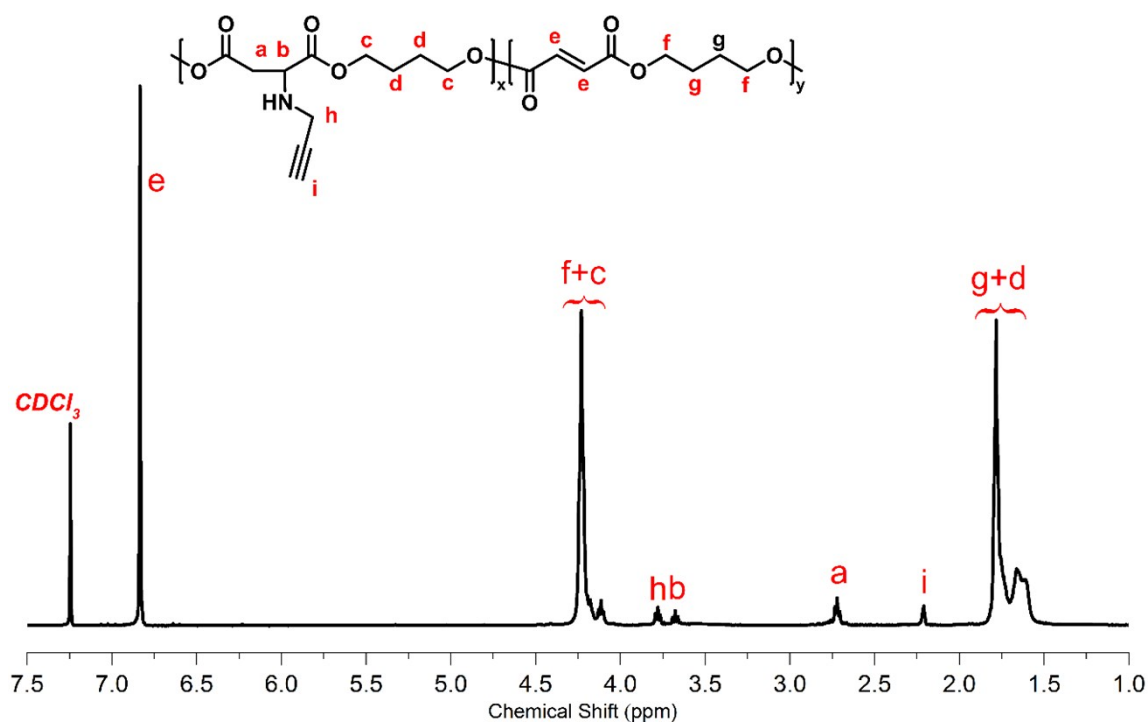

**Figure S9.** <sup>1</sup>H NMR spectrum of Entry 21 prepared by Michael addition of Entry 5 with propargylamine.

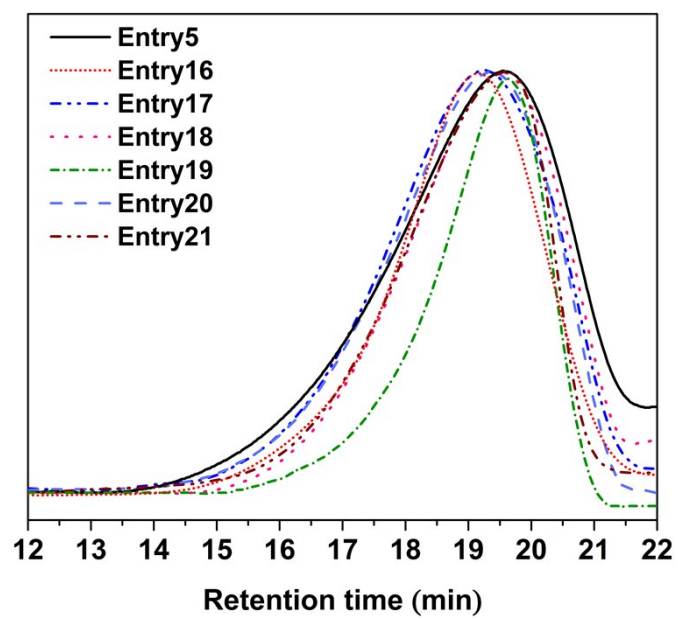

Figure S10. GPC curves of Entries 5, 16-21.
